# Supplementary material for: Low-temperature microwave-assisted pyrolysis of waste office paper and the application of bio-oil as an Al adhesive
Source: Royal Society of Chemistry journal article supplement (doi:10.1039/c4gc00768a), 2014-08-15
Supplement: c4gc00768a1.pdf [file c4gc00768a1.pdf]

**Supplemental Information**

**Low-temperature microwave-assisted pyrolysis of waste office paper and the application of bio-oil as an Al adhesive**

Zhanrong Zhang,<sup>a</sup> Duncan J. Macquarrie,<sup>a</sup> Mario De bruyn,<sup>a</sup> Vitaliy L. Budarin,<sup>a</sup> Andrew J. Hunt,<sup>a</sup> Mark J. Gronnow,<sup>b</sup> Jiajun Fan,<sup>a</sup> Peter S. Shuttleworth,<sup>c</sup> James H. Clark<sup>a</sup> and Avtar S. Matharu<sup>\*a</sup>

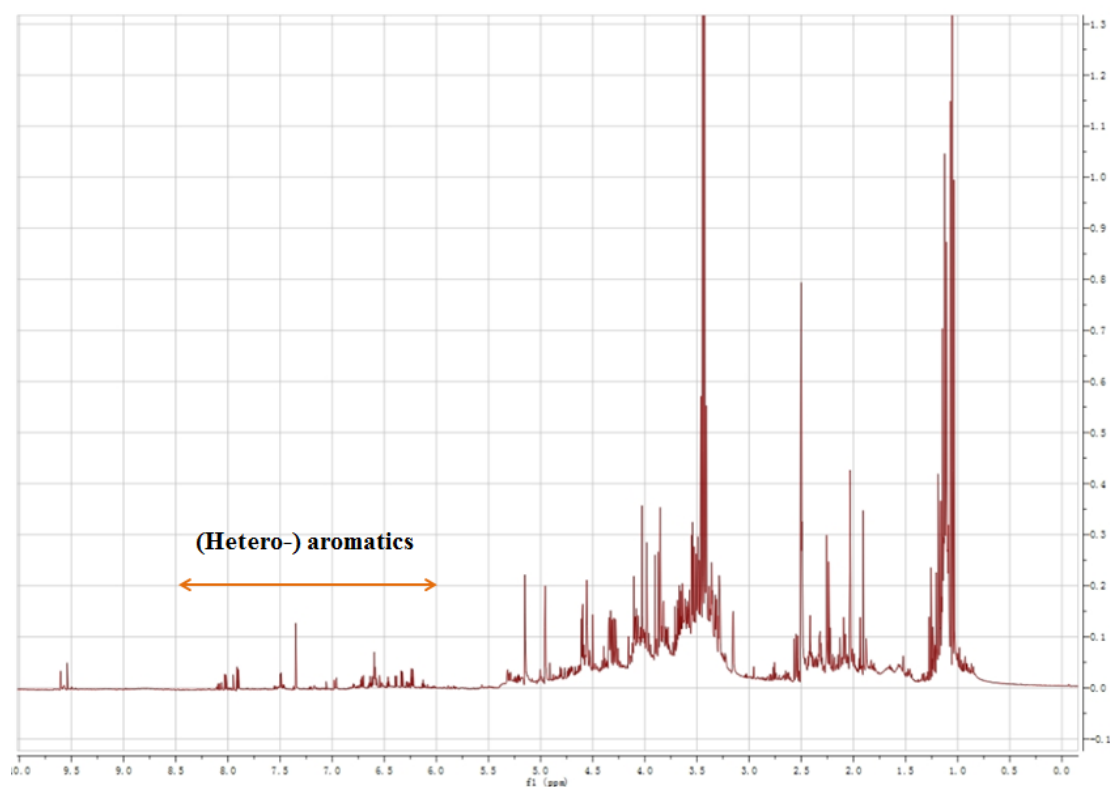

**Fig. S1**  $^1\text{H}$  NMR spectrum of organic phase bio-oil from microwave assisted fast pyrolysis of milled waste office paper in DMSO- $d_6$ . The presence of (hetero-) aromatics is confirmed by peaks between 6.0 – 8.5 ppm.

**Table S1** Comparison of  $^{13}\text{C}$  NMR chemical shifts of commercial reference samples and organic phase bio-oil from low temperature microwave-assisted pyrolysis of milled waste paper (All spectra used the central resonance of DMSO- $d_6$  ( $\delta\text{C}$ , 39.52 ppm) as the internal reference).

| Compound                    | Commercial sample (ppm) | Organic phase bio-oil (ppm) |
|-----------------------------|-------------------------|-----------------------------|
| Levogluconan                | 102.66                  | 102.67                      |
|                             | 76.96                   | 76.95                       |
|                             | 74.12                   | 74.11                       |
|                             | 72.28                   | 72.27                       |
|                             | 72.03                   | 72.02                       |
|                             | 65.44                   | 65.41                       |
| Levogluconenone             | 189.31                  | 188.42                      |
|                             | 151.23                  | 150.06                      |
|                             | 125.35                  | 124.96                      |
|                             | 100.65                  | 101.08                      |
|                             | 71.52                   | 71.48                       |
|                             | 66.16                   | 66.24                       |
| HMF                         | 178.10                  | 178.19                      |
|                             | 162.40                  | 162.46                      |
|                             | 152.01                  | 152.16                      |
|                             | 124.53                  | 124.59                      |
|                             | 109.90                  | 109.95                      |
|                             | 56.21                   | 56.31                       |
| 1, 2, 4 - trihydroxybenzene | 150.30                  | 150.15                      |
|                             | 145.78                  | 145.83                      |
|                             | 137.68                  | 137.87                      |
|                             | 115.92                  | 115.94                      |
|                             | 105.14                  | 105.16                      |
|                             | 103.56                  | 103.56                      |
